# Supplementary material
Source: MDPI journal article supplement (https://www.mdpi.com/2304-6767/10/4/70)
Supplement: s1 [file s1]

## Supplement 1. Preliminary ELISA experiments and optimization data for SCCA1 and SCCA2 in saliva.

### SCCA1 PRE-TESTING

The procedure was carried out according to the manufacturer's instructions, and therefore, a pre-test was performed since the ELISA kits used were not specific for the saliva samples as well as to determine the need for sample dilution in order to keep the samples within the standard curve.

The pre-test revealed low concentrations of SCCA1 in the saliva samples, so control samples (serum and plasma) were used to control the ELISA kit.

### SAMPLE DILUTION

The need for diluting samples was analyzed following the ELISA kit manufacturer's instructions.

### ELISA PLATE SAMPLE

|   | 1   | 2   | 3             | 4             | 5             | 6             | 7             | 8             | 9             | 10            | 11             | 12             |
|---|-----|-----|---------------|---------------|---------------|---------------|---------------|---------------|---------------|---------------|----------------|----------------|
| A | B   | B   | 1B<br>(1:1)   | 1B<br>(1:1)   | 2B<br>(1:1)   | 2B<br>(1:1)   | 3B<br>(1:1)   | 3B<br>(1:1)   | 5B<br>(1:1)   | 5B<br>(1:1)   | 15B (1:1)      | 15B<br>(1:1)   |
| B | St1 | St1 | 1B<br>(1:2)   | 1B<br>(1:2)   | 2B<br>(1:2)   | 2B<br>(1:2)   | 3B<br>(1:2)   | 3B<br>(1:2)   | 5B<br>(1:2)   | 5B<br>(1:2)   | 15SB (1:1)     | 15SB<br>(1:1)  |
| C | St2 | St2 | 1B<br>(1:10)  | 1B<br>(1:10)  | 2B<br>(1:10)  | 2B<br>(1:10)  | 3B<br>(1:10)  | 3B<br>(1:10)  | 5B<br>(1:10)  | 5B<br>(1:10)  | 15SB<br>(1:10) | 15SB<br>(1:10) |
| D | St3 | St3 | 1B<br>(1:25)  | 1B<br>(1:25)  | 2B<br>(1:25)  | 2B<br>(1:25)  | 3B<br>(1:25)  | 3B<br>(1:25)  | 5B<br>(1:25)  | 5B<br>(1:25)  | 15SB<br>(1:25) | 15SB<br>(1:25) |
| E | St4 | St4 | 1SB<br>(1:1)  | 1SB<br>(1:1)  | 2SB<br>(1:1)  | 2SB<br>(1:1)  | 3SB<br>(1:1)  | 3SB<br>(1:1)  | 5SB<br>(1:1)  | 5SB<br>(1:1)  | 6B (1:1)       | 6B<br>(1:1)    |
| F | St5 | St5 | 1SB<br>(1:2)  | 1SB<br>(1:2)  | 2SB<br>(1:2)  | 2SB<br>(1:2)  | 3SB<br>(1:2)  | 3SB<br>(1:2)  | 5SB<br>(1:2)  | 5SB<br>(1:2)  | 6A (1:25)      | 6A<br>(1:25)   |
| G | St6 | St6 | 1SB<br>(1:10) | 1SB<br>(1:10) | 2SB<br>(1:10) | 2SB<br>(1:10) | 3SB<br>(1:10) | 3SB<br>(1:10) | 5SB<br>(1:10) | 5SB<br>(1:10) | 6SB (1:1)      | 6SB<br>(1:1)   |
| H | St7 | St7 | 1SB<br>(1:25) | 1SB<br>(1:25) | 2SB<br>(1:25) | 2SB<br>(1:25) | 3SB<br>(1:25) | 3SB<br>(1:25) | 5SB<br>(1:25) | 5SB<br>(1:25) | 6SB (1:25)     | 6SB<br>(1:25)  |

St—standard; B and SB—unstimulated and stimulated saliva sample; black—control group; red—oral cancer group

## RESULTS

| SAMPLE      | CONCENTRATION (pg/ml)<br>Second order polynomial 0.9626 |
|-------------|---------------------------------------------------------|
| 1B (1:1)    | 16.50174243                                             |
| 1B (1:2)    | <                                                       |
| 1B (1:10)   | <                                                       |
| 1B (1:25)   | <                                                       |
| 1SB (1:1)   | <                                                       |
| 1SB (1:2)   | <                                                       |
| 1SB (1:10)  | <                                                       |
| 1SB (1:25)  | <                                                       |
| 2B (1:1)    | 33.51266964                                             |
| 2B (1:2)    | <                                                       |
| 2B (1:10)   | <                                                       |
| 2B (1:25)   | <                                                       |
| 2SB (1:1)   | 52.86923393                                             |
| 2SB (1:2)   | 4.820011092                                             |
| 2SB (1:10)  | <                                                       |
| 2SB (1:25)  | <                                                       |
| 3B (1:1)    | <                                                       |
| 3B (1:2)    | <                                                       |
| 3B (1:10)   | <                                                       |
| 3B (1:25)   | <                                                       |
| 3SB (1:1)   | <                                                       |
| 3SB (1:2)   | <                                                       |
| 3SB (1:10)  | <                                                       |
| 3SB (1:25)  | <                                                       |
| 4B (1:1)    | <                                                       |
| 4B (1:2)    | <                                                       |
| 4B (1:10)   | <                                                       |
| 4B (1:25)   | <                                                       |
| 4SB (1:1)   | <                                                       |
| 4SB (1:2)   | <                                                       |
| 4SB (1:10)  | <                                                       |
| 4SB (1:25)  | <                                                       |
| 15B (1:1)   | 152.8692339333326                                       |
| 15B (1:2)   | 66.2013313767905                                        |
| 15B (1:10)  | 18.7661891232367                                        |
| 15B (1:25)  | <                                                       |
| 15SB (1:1)  | 266.8989129887211                                       |
| 15SB (1:2)  | 123.9998202987222                                       |
| 15SB (1:10) | <                                                       |
| 15SB (1:25) | <                                                       |

The suggested results indicated no need for sample dilution.

#### PREPARATION OF SAMPLES FOR ANALYSIS:

Thawed saliva samples were centrifuged for 20 min at 1000xg; the obtained supernatant was used for analysis (parallel operation; 100  $\mu$ L sample).

#### ELISA PLATE sample

|   | 1   | 2   | 3    | 4    | 5    | 6    | 7    | 8    | 9    | 10   | 11   | 12   |
|---|-----|-----|------|------|------|------|------|------|------|------|------|------|
| A | B   | B   | Ser1 | Ser1 | 10B  | 10B  | 14B  | 14B  | 22B  | 22B  | 36B  | 36B  |
| B | St1 | St1 | Ser2 | Ser2 | 10SB | 10SB | 14SB | 14SB | 22SB | 22SB | 36SB | 36SB |
| C | St2 | St2 | Pla1 | Pla1 | 11B  | 11B  | 16B  | 16B  | 25B  | 25B  | 38B  | 38B  |
| D | St3 | St3 | Pla2 | Pla2 | 11SB | 11SB | 16SB | 16SB | 25SB | 25SB | 38SB | 38SB |
| E | St4 | St4 | 8B   | 8B   | 12B  | 12B  | 20B  | 20B  | 30B  | 30B  | 40B  | 40B  |
| F | St5 | St5 | 8SB  | 8SB  | 12SB | 12SB | 20SB | 20SB | 30SB | 30SB | 40SB | 40SB |
| G | St6 | St6 | 9B   | 9B   | 13B  | 13B  | 21B  | 21B  | 35B  | 35B  | 41B  | 41B  |
| H | St7 | St7 | 9SB  | 9SB  | 13SB | 13SB | 21SB | 21SB | 35SB | 35SB | 41SB | 41SB |

St—standard; Ser—serum sample; Pla—plasma sample; B and SB—unstimulated and stimulated saliva sample; black—control group; red—oral cancer group

Reading of OD (optical density) values was performed at once on a microtiter reader at a wavelength of 450 nm with a differential wavelength of 630 nm.

#### RESULTS

GraphPad Prism 7.03 personal computer program was used to calculate the results.

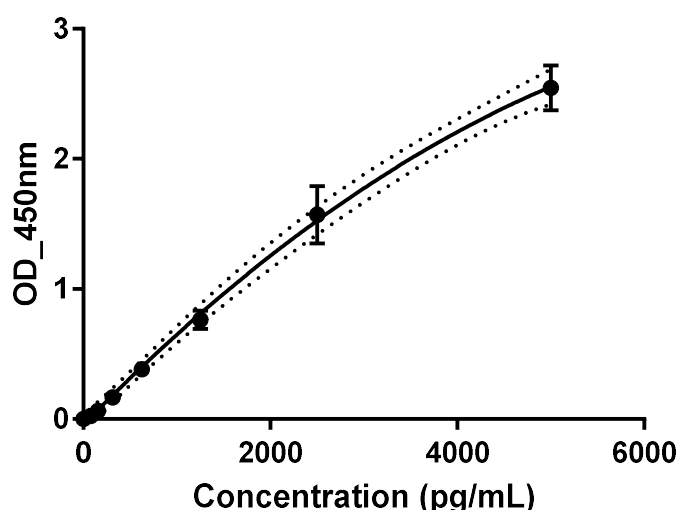

Figure S1. Standard interpolation curve: Second order polynomial (quadratic); R-square: 0.9915.

Interpolation of results with two more standard curves (Third order polynomial - cubic and Sigmoidal, 4PL, X is log concentration) was performed in order to compare the obtained results and obtain the best, most accurate R-square value. The second order polynomial (quadratic) standard curve proved to be the most precise.

| SAMPLE | SCCA1 (pg/mL) |
|--------|---------------|
| Ser1   | 1712.122398   |
| Ser2   | 1889.509331   |
| Pla1   | 1129.110089   |
| Pla2   | 989.988123    |
| 8B     | *             |
| 8SB    | *             |
| 9B     | *             |
| 9SB    | *             |
| 10B    | *             |
| 10SB   | *             |
| 11B    | *             |
| 11SB   | *             |
| 12B    | *             |
| 12SB   | *             |
| 13B    | *             |
| 13SB   | *             |
| 14B    | *             |
| 14SB   | *             |
| 16B    | *             |
| 16SB   | *             |
| 20B    | 172.528644    |
| 20SB   | 227.65166     |
| 21B    | 157.432663    |
| 21SB   | 178.712042    |
| 22B    | 417.432663    |
| 22SB   | 477.178671    |
| 25B    | 206.470633    |
| 25SB   | 322.840112    |
| 30B    | 147.840112    |
| 30SB   | 160.861206    |
| 35B    | 364.291137    |
| 35SB   | 562.233012    |
| 36B    | 178.712042    |
| 36SB   | 205.963307    |
| 38B    | 60.175386     |
| 38SB   | 71.841879     |
| 40B    | 112.45686     |
| 40SB   | 104.86973     |
| 41B    | 369.095375    |
| 41SB   | 472.528644    |

## SCCA2 PRE-TESTING

As for SCCA1, the procedure was carried out according to the manufacturer's instructions, and therefore, a pre-test was performed since the ELISA kit was not specific for the saliva samples as well as to determine the need to dilute the samples to keep the samples within the standard curve. Due to their instability, the control of standards was also carried out.

### PREPARATION OF SAMPLES FOR ANALYSIS:

Thawed saliva samples were centrifuged for 20 min at 1000xg; the obtained supernatant was used for analysis (parallel operation; 100  $\mu$ L sample).

### ELISA plate sample

|   | 1   | 2   | 3    | 4    | 5    | 6    | 7    | 8    | 9    | 10   | 11   | 12   |
|---|-----|-----|------|------|------|------|------|------|------|------|------|------|
| A | B   | B   | B    | B    | 7C   | 7C   | 11C  | 11C  | 22C  | 22C  | 36C  | 36C  |
| B | St1 | St1 | Stt1 | Stt1 | 7SC  | 7SC  | 11SC | 11SC | 22SC | 22SC | 36SC | 36SC |
| C | St2 | St2 | Stt2 | Stt2 | 8C   | 8C   | 12C  | 12C  | 25C  | 25C  | 38C  | 38C  |
| D | St3 | St3 | Stt3 | Stt3 | 8SC  | 8SC  | 12SC | 12SC | 25SC | 25SC | 38SC | 38SC |
| E | St4 | St4 | Stt4 | Stt4 | 9C   | 9C   | 20C  | 20C  | 30C  | 30C  | 40C  | 40C  |
| F | St5 | St5 | Stt5 | Stt5 | 9SC  | 9SC  | 20SC | 20SC | 30SC | 30SC | 40SC | 40SC |
| G | St6 | St6 | Stt6 | Stt6 | 10C  | 10C  | 21C  | 21C  | 35C  | 35C  | 41C  | 41C  |
| H | St7 | St7 | Stt7 | Stt7 | 10SC | 10SC | 21SC | 21SC | 35SC | 35SC | 41SC | 41SC |

St—standard; C and SC—unstimulated and stimulated saliva sample; black—control group; red—oral cancer group

Reading of OD (optical density) values was performed at once on a microtiter reader at a wavelength of 450 nm with a differential wavelength of 630 nm.

### RESULTS

GraphPad Prism 7.03 personal computer program was used to calculate the results.

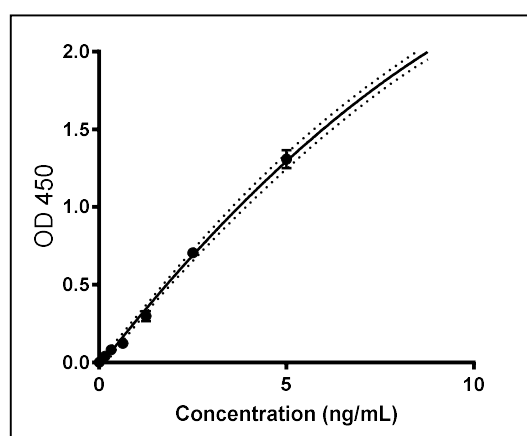

Figure S2. Standard interpolation curve: Second order polynomial (quadratic); R-square: 0.9974.

Interpolation of results with two more standard curves (Third order polynomial - cubic and Sigmoidal, 4PL, X is log concentration) was performed in order to compare the obtained results and obtain the best, most accurate R-square value. The second order polynomial (quadratic) standard curve proved to be most representative.

## RESULTS

| SAMPLE | SCCA2 (pg/mL) |
|--------|---------------|
| 7C     | 448.1798123   |
| 7SC    | 168.0016829   |
| 8C     | 955.9506923   |
| 8SC    | 702.6678509   |
| 9C     | 967.9457857   |
| 9SC    | 514.7789114   |
| 10C    | 246.6476765   |
| 10SC   | 97.85119554   |
| 11C    | 182.7204738   |
| 11SC   | 299.2790458   |
| 12C    | 549.8486883   |
| 12SC   | 748.2792706   |
| 20C    | 1462.205772   |
| 20SC   | 1293.437009   |
| 21C    | 350.4204391   |
| 21SC   | 748.2792706   |
| 22C    | 1309.183976   |
| 22SC   | 405.0301883   |
| 25C    | 208.9182936   |
| 25SC   | 357.0304938   |
| 30C    | 210.5569816   |
| 30SC   | 217.1132942   |
| 35C    | 140.2337296   |
| 35SC   | 491.4394227   |
| 36C    | 243.3635707   |
| 36SC   | 559.8820231   |
| 38C    | 494.7716649   |
| 38SC   | 601.7520143   |
| 40C    | 107.622571    |
| 40SC   | 226.9524511   |
| 41C    | 928.5660983   |
| 41SC   | 145.1307133   |
